# Supplementary material
Source: MDPI journal article supplement (https://www.mdpi.com/2414-4088/7/5/49)
Supplement: s1 [file s1]

Archive with 2 entries (2 files):
- File S1. PRISMA_2020_checklist.pdf
- Supplemental Table of articles 2023.pdf
